# Supplementary material for: Hyperosmolarity adversely impacts recombinant protein synthesis by Yarrowia lipolytica—molecular background revealed by quantitative proteomics
Source: PubMed Central journal article supplement (PMC8720085; doi:10.1007/s00253-021-11731-y), 2021-12-16
Supplement: 253_2021_11731_MOESM1_ESM.pdf [file 253_2021_11731_MOESM1_ESM.pdf]

**Hyperosmolarity adversely impacts heterologous secretory protein synthesis by *Yarrowia lipolytica* – molecular background revealed by global quantitative proteomics**

Applied Microbiology and Biotechnology

Monika Kubiak-Szymendera†, Bożena Skupień-Rabian‡, Urszula Jankowska‡, Ewelina Celińska\*†

†Department of Biotechnology and Food Microbiology, Poznan University of Life Sciences, Wojska Polskiego 48, 60-627 Poznan, Poland

‡Proteomics and Mass Spectrometry Core Facility, Malopolska Centre of Biotechnology, Jagiellonian University, Gronostajowa 7a, 30-387 Krakow, Poland

\*corresponding Author: ewelina.celinska@up.poznan.pl; ORCID: 0000-0001-8372-8459

Table S1 List of real-time PCR primers

| <b>Name</b>    | <b>Primer sequence 5' → 3'</b> |
|----------------|--------------------------------|
| r-t_SoAMY_Fw   | GTAACAACGTGGGAATCCGAAT         |
| r-t_SoAMY_Rev  | CCCTGGCCGTTCTGAAGTAG           |
| r-t_GCY12_Fw   | TAACGGTAACGACCCCGTCTA          |
| r-t_GCY12_Rev  | AGCCGGACTCGTCAATGTCT           |
| r-t_HSP12_Fw   | AGGGCGAGTCTTACATTGATCAG        |
| r-t_HSP12_Rev  | TTCCACCAAGGAAGTTGTTGA          |
| r-t_HSP20_Fw   | AAGCGGCGCCTTCGA                |
| r-t_HSP20_Rev  | GGCAGAGATGTTGTCTTCCTCAA        |
| r-t_STI1_Fw    | CCGCCATTGACCACTTCAC            |
| r-t_STI1_Rev   | AGGCGGATCTGTTGGAGTAGAG         |
| r-t_GRP78_Fw   | GCTTGACGCTAACGGAATTCTG         |
| r-t_GRP78_Rev  | TTGGAGAGACGGCCCTTGT            |
| r-t_HSP104_Fw  | CAGACTGTCTCGATCGGGTCTT         |
| r-t_HSP104_Rev | GGAGAGACCAAGGAAAAGGAAAAG       |
| r-t_DNAJ_Fw    | CCGTGAGACCTCCATCAACA           |
| r-t_DNAJ_Rev   | CGACACCCGCAGAATCG              |
| r-t_Mhy1_Fw    | CGGCGCCAGGAGCAT                |
| r-t_Mhy1_Rev   | GTCGCAGTTGAAAGGCTTCTCT         |
| r-t_HSF1_Fw    | GCCGCGTTCTTCAAACATA            |
| r-t_HSF1_Rev   | TGCCACCCGTACATGTTGAG           |
| r-t_TPS1_Fw    | GCGTGCCCGTGTTTCATG             |
| r-t_TPS1_Rev   | TGGAGTTGGAGAAGCCATTGT          |
| r-t_TPS2_Fw    | CCGGAACGCCATATGGATAA           |
| r-t_TPS2_Rev   | ATCGCCGAGCCACTTGTC             |
| r-t_TPS3_Fw    | TCCACCCTGACGAATTCTTCA          |
| r-t_TPS3_Rev   | TGATGGAGGCTGCACAATAGC          |
| r-t_FMO1_Fw    | ACCGAACCTGCCATGCA              |
| r-t_FMO1_Rev   | GCCGTCCTTTTTGTGCTCAA           |

|              |                          |
|--------------|--------------------------|
| r-t_SSA6_Fw  | CCAATGACCAGGGAAACAGAA    |
| r-t_SSA6_Rev | GCATCACCAATGAGTCGTTCA    |
| r-t_SSA7_Fw  | GAAGGACATCTCCACCAACCA    |
| r-t_SSA7_Rev | TGGGCGGAAGAAGACAGAGT     |
| r-t_HOG1_Fw  | CCTGAAAATCTGCGACTTTGG    |
| r-t_HOG1_Rev | TCGACACGTAGCCGGTCAT      |
| r-t_TPI1_Fw  | CAAGACCGAGGTGGTCATCTC    |
| r-t_TPI1_Rev | AGACACGGTGGGCTTCTCA      |
| r-t_AHP1_Fw  | CGAGATCGAGGGCAACGT       |
| r-t_AHP1_Rev | AAGCTCCTTATCGGAGTGAAA    |
| r-t_SKN7_Fw  | ATGGCCACGCCGACAA         |
| r-t_SKN7_Rev | TCTGCACCTCGCCATTCTG      |
| r-t_SKO1_Fw  | TCCGTTGAGCAGTCGTTT       |
| r-t_SKO1_Rev | CGAGAGTCGAGGAGCTCCAT     |
| r-t_RPL3_Fw  | TGCACCGTTGTGCGAGTT       |
| r-t_RPL3_Rev | GGTGAGCCTTCTTCTGCTTAAGAG |
| r-t_Kin2_Fw  | TCCAAATTCAGGACCAGTAAGG   |
| r-t_Kin2_Rev | CGCGTGTCGTTGAAAGCTT      |

Table S2 Details of PCA analysis and hierarchical clustering of the proteome profiles

|          | Sample No | # Protein identified |
|----------|-----------|----------------------|
| CONTROL  | 1         | 2336                 |
| CONTROL  | 2         | 2242                 |
| CONTROL  | 3         | 2342                 |
| CONTROL  | 4         | 2425                 |
| TEMP     | 5         | 2260                 |
| TEMP     | 6         | 2325                 |
| TEMP     | 7         | 2246                 |
| TEMP     | 8         | 2247                 |
| OSM      | 9         | 2390                 |
| OSM      | 10        | 2505                 |
| OSM      | 11        | 2363                 |
| OSM      | 12        | 2333                 |
| TEMP_OSM | 13        | 2348                 |
| TEMP_OSM | 14        | 2118                 |
| TEMP_OSM | 15        | 2437                 |
| TEMP_OSM | 16        | 2378                 |

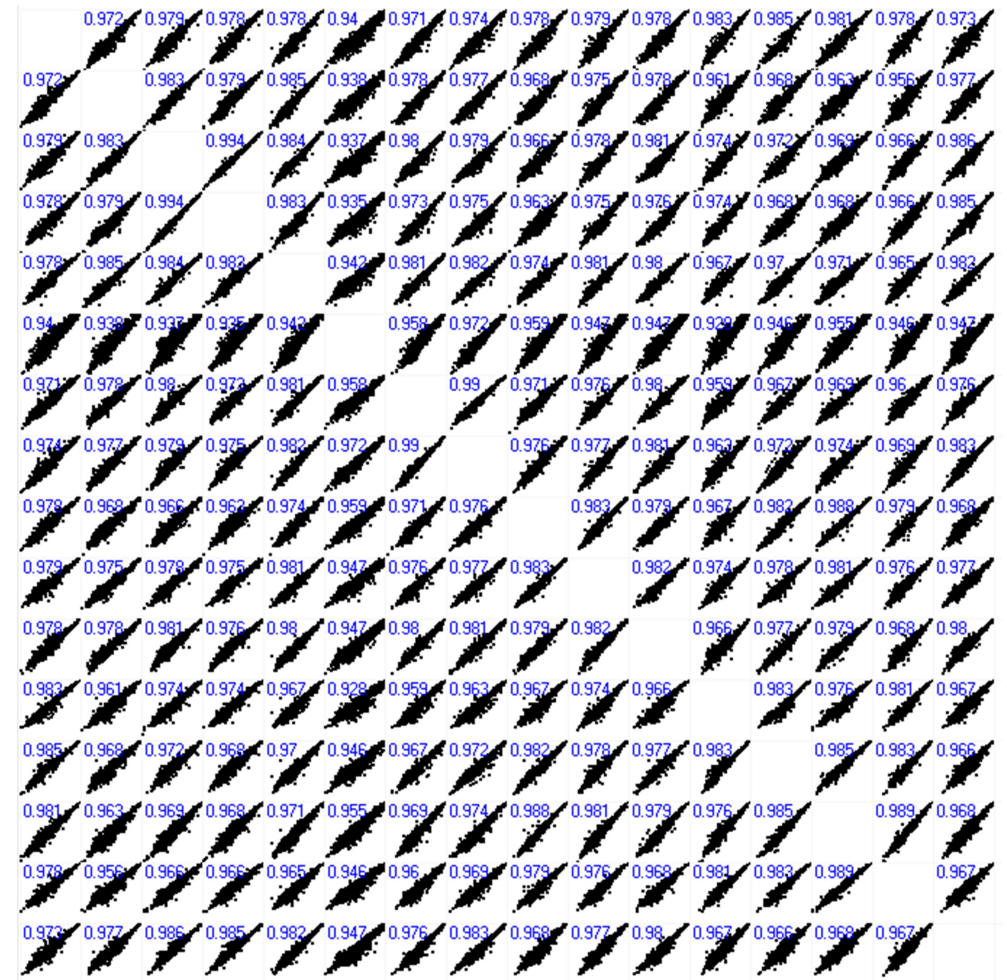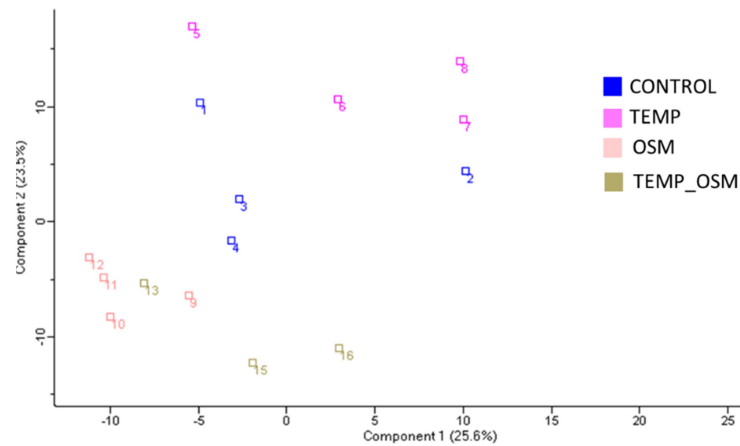

Table S3 Lists of all the DAPs with functional annotation and fold change (FC) of abundance

| YALI NAME     | ↓Osm vs control                      |                                                                                                                                           |                                                                                                                                                                                                       |                                                                                        |                       | FC    |
|---------------|--------------------------------------|-------------------------------------------------------------------------------------------------------------------------------------------|-------------------------------------------------------------------------------------------------------------------------------------------------------------------------------------------------------|----------------------------------------------------------------------------------------|-----------------------|-------|
|               | other name                           | function                                                                                                                                  | GRYC name/annotation                                                                                                                                                                                  | GRYC function                                                                          | notes                 |       |
| YALIOC19096g  |                                      |                                                                                                                                           | Hypothetical protein conserved in the <i>Yarrowia</i> clade                                                                                                                                           |                                                                                        |                       | -3.16 |
| YALIO_C06325g | HD domain-containing protein         | Actin-capping protein, nucleolus                                                                                                          |                                                                                                                                                                                                       | Actin capping protein – identified based on blastp. Sequence similarity                | actin capping protein | -2.90 |
| YALIO_B21846g | 4-hydroxyphenylpyruvate dioxygenase  | Oxidoreductase activity, involved in tyrosine metabolic process aromatic amino acid family catabolic process                              | Similar to uniprot e9cwp5 <i>coccidioides immitis</i> tcrp 4-hydroxyphenylpyruvate dioxygenase 4hppd hpd hppdase                                                                                      | 4-hydroxyphenylpyruvate dioxygenase                                                    |                       | -2.85 |
| YALIO_A12177g | TauD domain-containing protein       | Oxygenase, ALPHA-KETOGLUTARATE-DEPENDENT SULFONATE DIOXYGENASE, involved in cellular catabolic process, sulfur compound metabolic process | Weakly similar to uniprot Q12358 <i>Saccharomyces cerevisiae</i> YLL057C JLP1 Fe(II)-dependent sulfonate/alpha-ketoglutarate dioxygenase, involved in sulfonate catabolism for use as a sulfur source | Conserved hypothetical protein                                                         |                       | -2.50 |
| YALIO_A21439g | TauD domain-containing protein       | Oxygenase, ALPHA-KETOGLUTARATE-DEPENDENT SULFONATE DIOXYGENASE, involved in cellular catabolic process, sulfur compound metabolic process | Similar to uniprot Q755S1 <i>Neurospora crassa</i> NCU09800 putative dioxygenase                                                                                                                      | Dioxygenase. Putative                                                                  |                       | -2.28 |
| YALIO_B04312g | Inositol-3-phosphate synthase        | Isomerase, INOSITOL-3-PHOSPHATE SYNTHASE 1, involved in alcohol biosynthetic process, cellular carbohydrate biosynthetic process          | INO1 Myo-inositol-1-phosphate synthase                                                                                                                                                                | Myo-inositol-1-phosphate synthase                                                      |                       | -2.06 |
| YALIO_F04620g |                                      |                                                                                                                                           | Similar to uniprot Q6CCX8 <i>Yarrowia lipolytica</i> YALIOC05687g                                                                                                                                     | Hypothetical protein of a 4-member gene family, conserved in the <i>Yarrowia</i> clade |                       | -2.06 |
| YALIO_F31735g | Ribonucleoside-diphosphate reductase | Oxidoreductase complex; involved in nucleotide biosynthetic process, carbohydrate derivative biosynthetic process                         | Highly similar to uniprot q9p839 <i>candida albicans</i> rnr1 ribonucleotide reductase large subunit                                                                                                  |                                                                                        |                       | -1.84 |
| YALIO_D11125g |                                      | Replication protein                                                                                                                       | Similar to uniprot q92374 <i>schizosaccharomyces pombe</i> replication factor-a protein 3 (single-stranded dna- binding protein p12 subunit)                                                          |                                                                                        |                       | -1.77 |
| YALIO_B21428g | D-fructose-6-                        | Transaminase, GLUCOSAMINE--                                                                                                               | Highly similar to uniprot P14742 <i>Saccharomyces cerevisiae</i> YKL104C GFA1                                                                                                                         |                                                                                        |                       | -1.70 |

|               |                                               |                                                                                                                                                                                                                               |                                                                                                                                           |                                             |                                             |
|---------------|-----------------------------------------------|-------------------------------------------------------------------------------------------------------------------------------------------------------------------------------------------------------------------------------|-------------------------------------------------------------------------------------------------------------------------------------------|---------------------------------------------|---------------------------------------------|
|               | phosphate amidotransferase                    | FRUCTOSE-6-PHOSPHATE AMINOTRANSFERASE, ISOMERIZING, involved in UDP-N-acetylglucosamine metabolic process, organophosphate metabolic process, protein N-linked glycosylation, phosphate-containing compound metabolic process | (ohnolog of YMR084W) Glutamine-fructose-6-phosphate amidotransferase                                                                      |                                             |                                             |
| YALIO_D16841g | MMS19 nucleotide excision repair protein      | DNA REPAIR/TRANSCRIPTION PROTEIN MET18/MMS19, scaffold/adaptor protein                                                                                                                                                        | Weakly similar to uniprot P40469 <i>Saccharomyces cerevisiae</i> YIL128w MET18 involved in NER repair and RNA polymerase II transcription |                                             | -1.68                                       |
| YALIO_E34793g | ATP citrate synthase                          | Transferase                                                                                                                                                                                                                   | Uniprot q6c3h5 <i>yarrowia lipolytica</i> yali0e34793g acl1 atp citrate lyase                                                             | protein involved in glycolysis and TCA      | -1.66                                       |
| YALIO_D16467g | GST C-terminal domain-containing protein      | ELONGATION FACTOR 1-GAMMA, translational elongation                                                                                                                                                                           | Weakly similar to uniprot P29547 <i>Saccharomyces cerevisiae</i> YPL048w CAM1 translation elongation factor eef1 gamma                    | translation elongation factor gamma (eEF-1) | -1.63                                       |
| YALIO_B12562g |                                               | ELONGATION FACTOR 1-GAMMA, translational elongation                                                                                                                                                                           |                                                                                                                                           | translation elongation factor gamma (eEF-1) |                                             |
| YALIO_E31625g | U3 small nucleolar RNA-associated protein 22  | NUCLEOLAR RNA-ASSOCIATED PROTEIN, RNA metabolism protein, involved in rrna processing ribonucleoprotein complex export from nucleus                                                                                           | Similar to uniprot G8Y8Y3 <i>Millerozyma farinosa</i> Piso0_004494                                                                        | protein involved in ribosome biogenesis     | -1.57                                       |
| YALIO_F14245g | RRM domain-containing protein                 | MKI67 FHA DOMAIN-INTERACTING NUCLEOLAR PHOSPHOPROTEIN, RNA binding, involved in maturation of LSU-rrna from tricistronic rrna transcript (SSU-rrna, 5.8S rrna, LSU-rrna)                                                      |                                                                                                                                           |                                             | -1.56                                       |
| YALIO_E16324g | Importin N-terminal domain-containing protein | IMPORTIN N-TERMINAL DOMAIN-CONTAINING PROTEIN, involve in protein import into nucleus                                                                                                                                         | Similar to uniprot P46970 <i>Saccharomyces cerevisiae</i> YJR132w NMD5 NAM7P interacting protein                                          | Karyopherin. Putative                       | karyopherin. involved in nuclear im-/export |
| YALIO_F21406g | Carbonic anhydrase                            | Dehydratase                                                                                                                                                                                                                   | Weakly similar to uniprot p53615 <i>saccharomyces cerevisiae</i> nce103 nce3 ynl036w carbonic anhydrase                                   |                                             | -1.55                                       |

|               |                                               |                                                                                                                                               |                                                                                                                                                                                  |                                                                                  |                                                          |
|---------------|-----------------------------------------------|-----------------------------------------------------------------------------------------------------------------------------------------------|----------------------------------------------------------------------------------------------------------------------------------------------------------------------------------|----------------------------------------------------------------------------------|----------------------------------------------------------|
| YALIO_E19536g | SEC7 domain-containing protein                | Golgi-specific brefeldin a-resistance guanine nucleotide exchange factor 1                                                                    | Weakly similar to uniprot   p39993 <i>saccharomyces cerevisiae</i> yel022w (ohnolog of yjr031c) <i>gea2 gdp/gtp exchange factor for arf</i>                                      |                                                                                  | -1.51                                                    |
| YALIO_B15059g | FAS1, Fatty acid synthase subunit beta        | Involved in long-chain fatty acid metabolic process, fatty acid biosynthetic process                                                          | Fas1 fatty acid synthase subunit beta, putative                                                                                                                                  |                                                                                  | Protein involved in fatty acid metabolism<br>-1.50       |
| YALIO_D13090g | Phosducin domain-containing protein           | Viral or transposable element protein, VIRAL IAP-ASSOCIATED FACTOR HOMOLOG                                                                    | Similar to uniprot   Q12017 <i>Saccharomyces cerevisiae</i> YOR281c PLP2 IAP-associated factor <i>Viaf1</i>                                                                      | Protein that interacts with the CCT complex to stimulate actin folding. Putative | A494ctin folding promotor protein<br>-1.49               |
| YALIO_F10098g | Importin N-terminal domain-containing protein | Transporter activity, involved in regulation of protein transport, regulation of cellular localization, ribosomal subunit export from nucleus | Similar to uniprot   p30822 <i>saccharomyces cerevisiae</i> ygr218w <i>crm1 nuclear export factor, exportin</i>                                                                  | Major karyopherin. Putative                                                      | Karyopherin. Involved in nuclear im-/export<br>-1.47     |
| YALIO_B19162g | Aminotran_5 domain-containing protein         | L-CYSTEINE DESULFHYDRASE, lyase                                                                                                               | Similar to uniprot   O94021 <i>Candida albicans</i> Hypothetical 48.1 kda protein                                                                                                |                                                                                  | -1.47                                                    |
| YALIO_B14014g | Alcohol oxidase                               | Oxidoreductase, GLUCOSE-METHANOL-CHOLINE GMC OXIDOREDUCTASE                                                                                   | FAO1 Fatty alcohol oxidase                                                                                                                                                       |                                                                                  | Protein involved in fatty acid metabolism<br>-1.45       |
| YALIO_B19382g | Fatty acid synthase subunit alpha             |                                                                                                                                               | FAS2 Fatty acid synthase subunit alpha                                                                                                                                           |                                                                                  | -1.45                                                    |
| YALIO_E00726g | Tubulin beta chain                            | Involved in microtubule cytoskeleton organization, mitotic nuclear division                                                                   | Highly similar to uniprot   p02557 <i>saccharomyces cerevisiae</i> yfl037w <i>tub2</i>                                                                                           |                                                                                  | Tubulin<br>-1.45                                         |
| YALIO_D24431g |                                               |                                                                                                                                               | ACL2 ATP citrate lyase                                                                                                                                                           |                                                                                  | Protein involved in glycolysis and TCA<br>-1.44          |
| YALIO_D24750g | POX3, Acyl-coenzyme A oxidase 3               | Oxidoreductase in peroxisome, involved in lipid homeostasis, fatty acid beta-oxidation                                                        | Pox3 fatty-acyl coenzyme a oxidase                                                                                                                                               |                                                                                  | Protein involved in fatty acid metabolism<br>-1.41       |
| YALIO_D06930g | Pyruvate decarboxylase                        |                                                                                                                                               | Similar to uniprot   q06408 <i>saccharomyces cerevisiae</i> ydr380w <b>aro10</b> phenylpyruvate decarboxylase, catalyzes decarboxylation of phenylpyruvate to phenylacetaldehyde |                                                                                  | Protein involved in biosynthesis of amino acids<br>-1.41 |
| YALIO_A00264g | Isoleucyl-tRNA                                | Ligase activity, involved in trna                                                                                                             | Similar to uniprot   P09436 <i>Saccharomyces cerevisiae</i> YBL076c ILS1 isoleucyl-                                                                                              |                                                                                  | -1.41                                                    |

|               |                                               |                                                                                                                                                                                       |                                                                                                                                                       |                                                                                                                        |       |
|---------------|-----------------------------------------------|---------------------------------------------------------------------------------------------------------------------------------------------------------------------------------------|-------------------------------------------------------------------------------------------------------------------------------------------------------|------------------------------------------------------------------------------------------------------------------------|-------|
|               | synthetase                                    | metabolic process, translational elongation, cellular amino acid metabolic process                                                                                                    | trna synthetase                                                                                                                                       |                                                                                                                        |       |
| YALIO_D12144g | Importin N-terminal domain-containing protein | Transporter activity, signal sequence binding, involved in protein import into nucleus                                                                                                | Similar to uniprot  q06142 <i>saccharomyces cerevisiae</i> ylr347c kap95 karyopherin-beta singleton                                                   | Karyopherin. Involved in nuclear im-/export                                                                            | -1.40 |
| YALIO_F28413g | PCI domain-containing protein                 | Protease, ubiquitin proteasome pathway, 26S PROTEASOME NON-ATPASE REGULATORY SUBUNIT 3, involved in ubiquitin-dependent protein catabolic process                                     | Similar to uniprot  P40016 <i>Saccharomyces cerevisiae</i> YER021w SUN2 26S proteasome regulatory subunit                                             | Non-atpase regulatory subunit of the 26S proteasome lid<br>Protein involved in proteolysis via proteasomal degradation | -1.40 |
| YALIO_E20405g |                                               | Ligase, LONG-CHAIN-FATTY-ACID-COA LIGASE                                                                                                                                              | AAL7 Acyl/aryl-coa ligase                                                                                                                             | Protein involved in fatty acid metabolism                                                                              | -1.35 |
| YALIO_A06743g |                                               | Transferase, GLUTATHIONE S-TRANSFERASE-RELATED                                                                                                                                        | Similar to uniprot  Q8NJZ8 <i>Emericella nidulans</i> Theta class glutathione S-transferase                                                           | Theta class glutathione S-transferase                                                                                  | -1.35 |
| YALIO_B03630g |                                               | Reductase, RIBONUCLEOSIDE-DIPHOSPHATE REDUCTASE SMALL CHAIN                                                                                                                           | Highly similar to uniprot  Q9HEW8 <i>Emericella nidulans</i> Ribonucleotide reductase                                                                 |                                                                                                                        | -1.33 |
| YALIO_A21417g | Beta_elim_lyase domain-containing protein     | L-THREONINE ALDOLASE-RELATED, involved in cellular amino acid catabolic process, alpha-amino acid metabolic process, cellular amino acid biosynthetic process                         | Uniprot  Q6CG81 <i>Yarrowia lipolytica</i> YALIOA21417g CNT2 Hydroxytrimethyllysine aldolase, the second enzyme in the carnitine biosynthesis pathway | Hydroxytrimethyllysine aldolase                                                                                        | -1.33 |
| YALIO_F20592g |                                               | ASPARTYL AMINOPEPTIDASE, metallopeptidase activity                                                                                                                                    | Similar to uniprot  P14904 <i>Saccharomyces cerevisiae</i> YKL103c LAP4 aminopeptidase ysci precursor, vacuolar                                       | Vacuolar aminopeptidase ysci<br>Protein involved in proteolysis via vacuolar degradation                               | -1.32 |
| YALIO_F19910g | Branched-chain-amino-acid aminotransferase    | Transaminase, BRANCHED-CHAIN-AMINO-ACID AMINOTRANSFERASE, involved in oxidation-reduction process, branched-chain amino acid biosynthetic process, alpha-amino acid metabolic process | Uniprot  Q6C120 <i>Yarrowia lipolytica</i> YALIOF19910g <b>BAT2</b> Branched-chain Amino acid Transaminase, cytoplasmic                               | Protein involved in biosynthesis of amino acids                                                                        | -1.32 |
| YALIO_E19360g | Tubulin alpha chain                           | Involved in microtubule                                                                                                                                                               | Highly similar to uniprot  p09733                                                                                                                     | Alpha-1 tubulin<br><b>Tub1.</b>                                                                                        | -1.32 |



|               |                                             |                                                                                                                                                                                                            |                                                                                                                                                       |                                                             |                                                             |       |
|---------------|---------------------------------------------|------------------------------------------------------------------------------------------------------------------------------------------------------------------------------------------------------------|-------------------------------------------------------------------------------------------------------------------------------------------------------|-------------------------------------------------------------|-------------------------------------------------------------|-------|
|               |                                             | cytoskeleton organization, mitotic nuclear division                                                                                                                                                        | <i>saccharomyces cerevisiae</i> yml085c (ohnolog of yml124c) tub1 alpha-1 tubulin                                                                     |                                                             | Tubulin                                                     |       |
| YALIO_C10494g |                                             | Metallopeptidase activity, ASPARTYL AMINOPEPTIDASE                                                                                                                                                         | Similar to uniprot   P14904 <i>Saccharomyces cerevisiae</i> YKL103C LAP4 Vacuolar aminopeptidase                                                      | Vacuolar aminopeptidase ysci                                | Protein involved in proteolysis via vacuolar degradation    | -1.31 |
| YALIO_B07667g | N-(5'-phosphoribosyl)anthranilate isomerase | Isomerase, involved in alpha-amino acid metabolic process, aromatic amino acid family biosynthetic process, heterocycle biosynthetic process, cellular nitrogen compound biosynthetic process              | Trp1 phosphoribosylanthranilate isomerase                                                                                                             |                                                             |                                                             | -1.29 |
| YALIO_F08591g |                                             | Acetyltransferase, GLUCOSE REPRESSIBLE PROTEIN MAK10, N-ALPHA-ACETYLTRANSFERASE 35, NATC AUXILIARY SUBUNIT                                                                                                 | Weakly similar to uniprot   Q02197 <i>Saccharomyces cerevisiae</i> YEL053c MAK10 glucose-repressible protein                                          |                                                             |                                                             | -1.28 |
| YALIO_C24101g | Pyruvate carboxylase                        | Ligase activity, PYRUVATE CARBOXYLASE, MITOCHONDRIAL, involved in carbohydrate biosynthetic process, small molecule biosynthetic process, glucose metabolic process, monocarboxylic acid metabolic process | <b>PYC1</b> Pyruvate carboxylase                                                                                                                      |                                                             | Karyopherin. Involved in nuclear im-/export                 | -1.27 |
| YALIO_B02860g | 26S proteasome regulatory subunit RPN1      | Protease, Ubiquitin proteasome pathway, 26S PROTEASOME NON-ATPASE REGULATORY SUBUNIT, involved in proteasome-mediated ubiquitin-dependent protein catabolic process                                        | Similar to uniprot   P38764 <i>Saccharomyces cerevisiae</i> YHR027C RPN1 Non-atpase base subunit of the 19S regulatory particle of the 26S proteasome | Non-atpase base subunit of the 19S RP of the 26S proteasome | Protein involved in proteolysis via proteasomal degradation | -1.26 |
| YALIO_F09185g | PK1 Pyruvate kinase                         | Involved in oxidation-reduction process, glycolytic process                                                                                                                                                | <b>Pyk1</b> pyruvate kinase                                                                                                                           |                                                             | Protein involved in glycolysis and tca                      | -1.26 |
| YALIO_D25168g |                                             | Homocysteine/cysteine synthase                                                                                                                                                                             | Similar to uniprot   p06106 <i>saccharomyces cerevisiae</i> ylr303w met25 o-acetylhomoserine sulfhydrylase                                            | O-acetyl homoserine-o-acetyl serine sulfhydrylase           | Cysk-met25. Playing role in synthesis of sulfur-            | -1.26 |

|               |                                             |                                                                                                                                                       |                                                                                                                                                                       |                                       |                                                              |       |
|---------------|---------------------------------------------|-------------------------------------------------------------------------------------------------------------------------------------------------------|-----------------------------------------------------------------------------------------------------------------------------------------------------------------------|---------------------------------------|--------------------------------------------------------------|-------|
|               |                                             |                                                                                                                                                       |                                                                                                                                                                       |                                       | containing amino acids                                       |       |
| YALIO_F12661g | WD_REPEATS_REGION domain-containing protein | Pak1 interacting protein 1                                                                                                                            | Weakly similar to uniprot p20484 <i>saccharomyces cerevisiae</i> ykl021c mak11 protein involved in an early, nucleolar step of 60s ribosomal subunit biogenesis       |                                       | Protein involved in ribosome biogenesis                      | -1.26 |
| YALIO_F16291g | Lysine--trna ligase                         | LYSYL-TRNA SYNTHETASE, aminoacyl-trna synthetase, involved in trna metabolic process, translational elongation, cellular amino acid metabolic process | Highly similar to uniprot P15180 <i>Saccharomyces cerevisiae</i> YDR037w KRS1 lysyl-trna synthetase, cytosolic                                                        | Lysyl-trna synthetase. Cytosolic      | Amino acid-trna (aa-trna) synthetases specific to Lysine     | -1.25 |
| YALIO_D10571g | Proliferating cell nuclear antigen          | DNA polymerase processivity factor, DNA replication                                                                                                   | Similar to uniprot Q03392 <i>Schizosaccharomyces pombe</i> Proliferating cell nuclear antigen (PCNA)                                                                  | Proliferating cell nuclear antigen    |                                                              | -1.24 |
| YALIO_B14399g | Pyrroline-5-carboxylate reductase           | PYRROLINE-5-CARBOXYLATE REDUCTASE, Proline biosynthesis                                                                                               | Similar to uniprot Q12740 <i>Zalerion arboricola</i> <b>PRO3</b> Pyrroline-5-carboxylate reductase (P5C reductase)                                                    |                                       | Protein involved in biosynthesis of amino acids              | -1.23 |
| YALIO_E05027g | Prolyl-tRNA synthetase                      | Aminoacyl-trna synthetase, involved in trna metabolic process, translational elongation, cellular amino acid metabolic process                        | Similar to uniprot P38708 <i>Saccharomyces cerevisiae</i> YHR020W Conserved protein of unknown function that may interact with ribosomes, putative prolyl-trna ligase |                                       | Amino acid-trna (aa-trna) synthetases specific to Proline    | -1.23 |
| YALIO_E24607g | Leucyl-tRNA synthetase                      | Aminoacyl-trna synthetase, involved in trna metabolic process, translational elongation, cellular amino acid metabolic process                        | Similar to uniprot P26637 <i>Saccharomyces cerevisiae</i> YPL160w CDC60 leucine--trna ligase, cytosolic                                                               | Cytosolic leucyl trna synthetase      | Amino acid-trna (aa-trna) synthetases specific to Leucine    | -1.23 |
| YALIO_E05005g | Asparaginyl-trna synthetase                 |                                                                                                                                                       | Similar to uniprot P38707 <i>Saccharomyces cerevisiae</i> YHR019c DED81 asparaginyl-trna-synthetase                                                                   | Cytosolic asparaginyl-trna synthetase | Amino acid-trna (aa-trna) synthetases specific to Asparagine | -1.23 |
| YALIO_B14509g | S-adenosylmethionine synthase               | Nucleotidyltransferase                                                                                                                                | Highly similar to uniprot q9p842 <i>candida albicans</i> casam2 s-adenosylmethionine synthetase 2                                                                     | S-adenosylmethionine synthetase 2     | Protein including sulfur                                     | -1.22 |

|               |                                              |                                                                                                                                                                                    |                                                                                                                                                  |                                          |                                                                  |       |
|---------------|----------------------------------------------|------------------------------------------------------------------------------------------------------------------------------------------------------------------------------------|--------------------------------------------------------------------------------------------------------------------------------------------------|------------------------------------------|------------------------------------------------------------------|-------|
|               |                                              |                                                                                                                                                                                    |                                                                                                                                                  |                                          | compounds                                                        |       |
| YALIO_C22088g |                                              | CYSTATHIONINE GAMMA-SYNTHASE, Methionine biosynthesis, involved in alpha-amino acid metabolic process, cellular amino acid biosynthetic process, sulfur compound metabolic process | Similar to uniprot P38716 <i>Saccharomyces cerevisiae</i> YHR112c similarity to cystathionine gamma-synthases                                    |                                          | Metb, playing role in synthesis of sulfur-containing amino acids | -1.21 |
| YALIO_E28468g | Glutamyl-tRNA synthetase                     | GLUTAMATE--TRNA LIGASE, CYTOPLASMIC, aminoacyl-trna synthetase                                                                                                                     | Similar to uniprot P46655 <i>Saccharomyces cerevisiae</i> YGL245w Glutamyl-trna synthetase, cytoplasmic                                          | Glutamyl-trna synthetase (glurs)         | Amino acid-trna (aa-trna) synthetases specific to Glutamate      | -1.21 |
| YALIO_E13035g | Peptidase_M24 domain-containing protein      | Protease, PROLIFERATION-ASSOCIATED PROTEIN 2G4                                                                                                                                     | Similar to uniprot Q09184 <i>Schizosaccharomyces pombe</i> SPAC23H4.09 curved DNA-binding protein (42 kda protein)                               | Curved DNA-binding protein               |                                                                  | -1.21 |
| YALIO_A12045g | 6,7-dimethyl-8-ribityllumazine synthase      | Transferase, involved in flavin biosynthesis/lumazine synthase                                                                                                                     | Similar to uniprot p50861 <i>saccharomyces cerevisiae</i> yol143c rib4 6,7-dimethyl -8-ribityllumazine synthase                                  | Lumazine synthase (dmrl synthase)        |                                                                  | -1.21 |
| YALIO_B19558g | TRM8, tRNA (guanine-N(7)-)-methyltransferase | RNA processing factor, involved in trna methylation                                                                                                                                |                                                                                                                                                  |                                          |                                                                  | -1.21 |
| YALIO_B02838g |                                              | Serine protease, DIPEPTIDYL PEPTIDASE 4-RELATED                                                                                                                                    | Similar to uniprot Q96VT7 <i>Aspergillus niger</i> Dipeptidyl aminopeptidase type IV                                                             | Dipeptidyl aminopeptidase type IV        |                                                                  | -1.20 |
| YALIO_E15642g | Replication protein A subunit                |                                                                                                                                                                                    |                                                                                                                                                  |                                          |                                                                  | -1.20 |
| YALIO_F09834g | 26S proteasome regulatory subunit RPN2       | Protease, proteasome-mediated ubiquitin-dependent protein catabolic process                                                                                                        | Similar to uniprot p32565 <i>saccharomyces cerevisiae</i> yil075c sen3 26s proteasome regulatory subunit                                         | Subunit of the 26s proteasome            | Protein involved in proteolysis via proteasomal degradation      | -1.20 |
| YALIO_B08943g | Tryptophanyl-tRNA synthetase                 | Aminoacyl-trna synthetase                                                                                                                                                          | Similar to uniprot Q12109 <i>Saccharomyces cerevisiae</i> YOL097C WRS1 Cytoplasmic tryptophanyl-trna synthetase, aminoacylates tryptophanyl-trna | Cytoplasmic tryptophanyl-trna synthetase | Amino acid-trna (aa-trna) synthetases specific to Tryptophan     | -1.20 |

|               |                                                             |                                                                                                                                                                                                                                                  |                                                                                                                                                                                                          |                                               |                                                                    |       |
|---------------|-------------------------------------------------------------|--------------------------------------------------------------------------------------------------------------------------------------------------------------------------------------------------------------------------------------------------|----------------------------------------------------------------------------------------------------------------------------------------------------------------------------------------------------------|-----------------------------------------------|--------------------------------------------------------------------|-------|
| YALIO_F07711g | Glucose-6-phosphate isomerase                               | Involved in pentose phosphate pathway/glycolysis                                                                                                                                                                                                 | Highly similar to uniprot   p12709 <i>saccharomyces cerevisiae</i> ybr196c <b>pgi1</b> glucose-6-phosphate isomerase                                                                                     | Glucose-6-phosphate isomerase                 | Protein involved in glycolysis and tca                             | -1.20 |
| YALIO_C19624g | ETR1, Enoyl-[acyl-carrier-protein] reductase, mitochondrial | Reductase, involved in fatty acid metabolic process                                                                                                                                                                                              | Etr1 2-enoil thioester reductase, member of the medium chain dehydrogenase/reductase family                                                                                                              |                                               |                                                                    | 1.20  |
| YALIO_A19888g |                                                             | Meiotically up-regulated gene 191 protein                                                                                                                                                                                                        | Similar to uniprot   a5dbk5 <i>mezerozyma guilliermondii</i> hypothetical protein pgug_00660                                                                                                             |                                               |                                                                    | 1.23  |
| YALIO_E25696g |                                                             | CO-CHAPERONE PROTEIN DJLA, chaperone activity                                                                                                                                                                                                    | Similar to uniprot   Q9HGM9 <i>Schizosaccharomyces pombe</i> DNAJ domain protein                                                                                                                         | DNAJ domain protein                           | ER-localized (co)chaperone                                         | 1.23  |
| YALIO_C03850g | RanBD1 domain-containing protein                            | Scaffold/adaptor protein, NUCLEAR PORE COMPLEX PROTEIN NUP50A-RELATED                                                                                                                                                                            | Weakly similar to uniprot   P14907 <i>Saccharomyces cerevisiae</i> YJL041W NSP1 Essential component of the nuclear pore complex, which mediates nuclear import and export                                |                                               |                                                                    | 1.28  |
| YALIO_F00880g |                                                             | Chaperone, DNAJ-LIKE-2, ISOFORM A                                                                                                                                                                                                                | Similar to uniprot   P25491 <i>Saccharomyces cerevisiae</i> YNL064c YDJ1 mitochondrial and ER import protein                                                                                             | Type I HSP40 co-chaperone                     | ER-localized (co)chaperone                                         | 1.31  |
| YALIO_F23551g |                                                             | Transferase, THIOSULFATE SULFERTANSFERASE, involved in alpha-amino acid metabolic process, sulfur compound metabolic process                                                                                                                     | Similar to uniprot   Q875D2 <i>Podospora anserina</i> , similarity to thiosulfate sulfurtransferases                                                                                                     | Thiosulfate sulfurtransferase                 |                                                                    | 1.31  |
| YALIO_C11341g |                                                             | SPHINGOLIPID LONG CHAIN BASE-RESPONSIVE PROTEIN <b>PIL1</b> , involved in endocytosis protein phosphorylation, vesicle budding from membrane, cellular component assembly, negative regulation of protein kinase activity, membrane invagination | Highly similar to uniprot   Q12230 <i>Saccharomyces cerevisiae</i> YPL004C LSP1 Primary component of eisosomes, which are large immobile patch structures at the cell cortex associated with endocytosis | Primary component of eisosomes                | Protein involved in cellular membrane invagination and endocytosis | 1.31  |
| YALIO_B09647g | Multifunctional fusion protein                              | Dehydrogenase, DELTA-1-PYRROLINE-5-CARBOXYLATE DEHYDROGENASE 1, ISOFORM A-RELATED, involved in heterocycle catabolic process, cellular amino acid catabolic process, alpha-amino acid metabolic process, organic cyclic compound                 | Similar to uniprot   P07275 <i>Saccharomyces cerevisiae</i> YHR037W PUT2 Delta-1-pyrroline-5-carboxylate dehydrogenase, mitochondrial precursor                                                          | Delta-1-pyrroline-5-carboxylate dehydrogenase |                                                                    | 1.32  |

|               |                                     |                                                                                                                                               |                                                                                                                             |                                                                      |                                                                    |      |
|---------------|-------------------------------------|-----------------------------------------------------------------------------------------------------------------------------------------------|-----------------------------------------------------------------------------------------------------------------------------|----------------------------------------------------------------------|--------------------------------------------------------------------|------|
|               |                                     | catabolic process                                                                                                                             |                                                                                                                             |                                                                      |                                                                    |      |
| YALIO_B14102g |                                     | Non-motor actin binding protein, DREBRIN-LIKE PROTEIN, involved in actin filament polymerization, regulation of actin filament polymerization | Weakly similar to uniprot P15891 <i>Saccharomyces cerevisiae</i> YCR088w ABP1 Actin binding protein                         |                                                                      | Protein involved in cellular membrane invagination and endocytosis | 1.36 |
| YALIO_E02310g | Glutathione peroxidase              | Peroxidase, GLUTATHIONE PEROXIDASE-LIKE PEROXIREDOXIN 1-RELATED                                                                               | Highly similar to uniprot P40581 <i>Saccharomyces cerevisiae</i> YIR037W (ohnolog of YKL026C) HYR1 glutathione peroxidase   | Thiol peroxidase                                                     | Protein involved in oxidative stress response                      | 1.36 |
| YALIO_D01980g |                                     | Benzil reductase ((s)-benzoin forming) irc24                                                                                                  | Similar to uniprot p40579 <i>saccharomyces cerevisiae</i> yir035c similarity to human corticosteroid 11-beta- dehydrogenase | Cytoplasmic short-chain dehydrogenase/reductase                      |                                                                    | 1.38 |
| YALIO_B09471g | PHB domain-containing protein       | Transporter, STOMATIN-LIKE PROTEIN 2, MITOCHONDRIAL                                                                                           | Similar to uniprot O60121 <i>Schizosaccharomyces pombe</i> Stomatin family protein                                          |                                                                      |                                                                    | 1.38 |
| YALIO_F16379g |                                     | Membrane traffic protein, DYNAMIN-RELATED PROTEIN DNM1                                                                                        | Similar to uniprot P54861 <i>Saccharomyces cerevisiae</i> YLL001w DNM1 dynamin-related protein                              | Dynammin-related gtpase involved in mitochondrial organization       |                                                                    | 1.41 |
| YALIO_D22352g |                                     | HEAT SHOCK PROTEIN 70KDA, involved in chaperone-mediated protein folding, cellular response to unfolded protein, 'de novo' protein folding    | <b>SSA8</b> /SSA-B HSP70 protein                                                                                            |                                                                      | Cytosolic (co)chaperone                                            | 1.44 |
| YALIO_D08778g | Epimerase domain-containing protein | Dehydratase, NAD DEPENDENT EPIMERASE/DEHYDRATASE                                                                                              | Similar to uniprot P53183 <i>Saccharomyces cerevisiae</i> YGL039w                                                           | Oxidoreductase shown to reduce carbonyl compounds to chiral alcohols | Aldo-keto reductase involved in polyol synthesis                   | 1.44 |
| YALIO_F22187g |                                     | Dauer up-regulated-related                                                                                                                    | Some similarities with uniprot q7s1u2 <i>neurospora crassa</i> ncu09057.1 hypothetical protein                              |                                                                      |                                                                    | 1.44 |
| YALIO_F00682g | DJ-1_Pfpl domain-containing protein | Glutathione-independent glyoxalase hsp31-related                                                                                              | Similar to uniprot q04432 <i>saccharomyces cerevisiae</i> ydr533c hypothetical protein                                      | Methylglyoxalase that converts methylglyoxal to d-lactate            | Protein involved in oxidative stress response                      | 1.46 |
| YALIO_B00924g |                                     |                                                                                                                                               | Hypothetical protein conserved in the <i>Yarrowia</i> clade                                                                 |                                                                      |                                                                    | 1.46 |

|               |                                                                       |                                                                                                                               |                                                                                                                                            |                                                                                                    |                                                    |      |
|---------------|-----------------------------------------------------------------------|-------------------------------------------------------------------------------------------------------------------------------|--------------------------------------------------------------------------------------------------------------------------------------------|----------------------------------------------------------------------------------------------------|----------------------------------------------------|------|
| YALIO_C07502g |                                                                       |                                                                                                                               | SLA2 Sla2p cytoskeleton assembly control protein                                                                                           | Sla2p cytoskeleton assembly control protein                                                        |                                                    | 1.48 |
| YALIO_D06501g | 2,5-diamino-6-(5-phospho-D-ribosylamino)pyrimidin-4(3H)-one reductase | Reductase, DIHYDROFOLATE REDUCTASE FAMILY PROTEIN                                                                             | Similar to uniprot P33312 <i>Saccharomyces cerevisiae</i> YBR153w RIB7 5-amino-6-(5-phosphoribosylamino)uracil reductase                   | Diaminohydroxyphosphoribosylaminopyrimidine deaminase                                              |                                                    | 1.50 |
| YALIO_C04213g |                                                                       | BYSTIN, involved in rrna processing                                                                                           | Similar to uniprot P38333 <i>Saccharomyces cerevisiae</i> YBR247c ENP1 effects N-glycosylation                                             | Protein associated with U3 and U14 snornas                                                         |                                                    | 1.50 |
| YALIO_F27379g | Sec2p domain-containing protein                                       | Guanyl-nucleotide exchange factor, RAB GUANINE NUCLEOTIDE EXCHANGE FACTOR SEC2, involved in vesicle fusion to plasma membrane | Weakly similar to uniprot O13930 <i>Schizosaccharomyces pombe</i> hypothetical serine-rich protein                                         | Weakly similar to uniprot O13930 <i>Schizosaccharomyces pombe</i> hypothetical serine-rich protein | Vesicle transportati on                            | 1.53 |
| YALIO_A06435g |                                                                       | Serine protease, PEPTIDASE S8                                                                                                 | Similar to uniprot P09232 <i>Saccharomyces cerevisiae</i> YEL060C (ohnolog of YOR003W) <b>PRB1</b> protease B, vacuolar                    | Vacuolar proteinase B with H3 N-terminal endopeptidase activity                                    | Major vacuolar protease <b>PRB1</b>                | 1.54 |
| YALIO_E27962g | Sigma-54 factor interaction domain-containing protein                 | HEAT SHOCK PROTEIN 104, protease, involved in cellular response to heat                                                       | Highly similar to uniprot P31539 <i>Saccharomyces cerevisiae</i> YLL026w HSP104 heat shock protein                                         | Hsp that cooperates with Ydj1p (Hsp40) and Ssa1p (Hsp70)                                           | Cytosolic (co)chaperone                            | 1.59 |
| YALIO_B15840g | Aha1_N domain-containing protein                                      | Heat shock protein 90 hsp90 co-chaperone aha-1                                                                                | Similar to uniprot q12449 <i>saccharomyces cerevisiae</i> ydr214w aha1 co-chaperone that binds to hsp82p and activates its atpase activity | Co-chaperone that binds hsp82p and activates its atpase activity                                   | Cytosolic (co)chaperone                            | 1.60 |
| YALIO_F04169g | Alpha-1,4 glucan phosphorylase                                        | Glycogen phosphorylase                                                                                                        | Similar to uniprot p06738 <i>saccharomyces cerevisiae</i> ypr160w gph1 glycogen phosphorylase                                              | Glycogen phosphorylase required for the mobilization of glycogen                                   |                                                    | 1.62 |
| YALIO_E02024g |                                                                       |                                                                                                                               | Hypothetical protein conserved in the <i>Yarrowia</i> clade                                                                                |                                                                                                    |                                                    | 1.67 |
| YALIO_E33297g |                                                                       | Transcription cofactor, PIRIN-RELATED                                                                                         | Similar to uniprot Q87319 <i>Neurospora crassa</i> B9B11.100 related to pirin                                                              |                                                                                                    |                                                    | 1.68 |
| YALIO_D13442g | ENTH domain-containing protein                                        | Involved in endocytosis, vesicle budding from membrane, membrane invagination                                                 | Similar to uniprot p47160 <i>saccharomyces cerevisiae</i> yjr125c ent3 cytoskeletal adaptor                                                | Protein containing an n-terminal epsin-like domain                                                 | Protein involved in cellular membrane invagination | 1.75 |

|               |                                     |                                                                                                                                            |                                                                                                                             |                                    |                                                  |      |
|---------------|-------------------------------------|--------------------------------------------------------------------------------------------------------------------------------------------|-----------------------------------------------------------------------------------------------------------------------------|------------------------------------|--------------------------------------------------|------|
|               |                                     |                                                                                                                                            |                                                                                                                             |                                    | and endocytosis                                  |      |
| YALIO_F12463g |                                     | Protease, HEAT SHOCK PROTEIN 78, MITOCHONDRIAL, involved in cellular response to heat                                                      | Similar to uniprot P33416 <i>Saccharomyces cerevisiae</i> YDR258C <b>HSP78</b><br>Oligomeric mitochondrial matrix chaperone |                                    | Mitochondrial (co)chaperone                      | 1.77 |
| YALIO_E35046g |                                     | HEAT SHOCK PROTEIN 70KDA, involved in chaperone-mediated protein folding, cellular response to unfolded protein, 'de novo' protein folding | SSA6/SSA-D HSP70 protein                                                                                                    |                                    | Cytosolic (co)chaperone                          | 1.80 |
| YALIO_F06688g |                                     | Uncharacterized protein yjbq-related                                                                                                       | Highly similar to uniprot o14155 <i>schizosaccharomyces pombe</i> spac4a8.02c. Gene                                         |                                    |                                                  | 1.81 |
| YALIO_D16775g |                                     |                                                                                                                                            | Similar to uniprot P38884 <i>Saccharomyces cerevisiae</i> YHR198c                                                           |                                    |                                                  | 1.85 |
| YALIO_B10362g |                                     | Primary active transporter, MITOCHONDRIAL IMPORT RECEPTOR SUBUNIT TOM70                                                                    | Similar to uniprot Q9HEG7 <i>Neurospora crassa</i> tom70 Mitochondrial precursor protein import receptor                    |                                    |                                                  | 1.86 |
| YALIO_B15510g | Glycosidase                         | Glycosyl hydrolase-related                                                                                                                 | Similar to uniprot p32623 <i>saccharomyces cerevisiae</i> yel040w utr2 cell wall protein                                    |                                    |                                                  | 1.90 |
| YALIO_F24937g | Epimerase domain-containing protein | Dehydratase, NAD DEPENDENT EPIMERASE/DEHYDRATASE                                                                                           | Similar to uniprot P53111 <i>Saccharomyces cerevisiae</i> YGL157w ARI1 NADPH-dependent aldehyde reductase                   | NADPH-dependent aldehyde reductase | Aldo-keto reductase involved in polyol synthesis | 1.95 |
| YALIO_B08272g | PH domain-containing protein        | Cytoskeletal signaling protein slm1                                                                                                        | Some similarities with uniprot p08965 <i>schizosaccharomyces pombe</i> meiosis protein mei2                                 |                                    |                                                  | 1.98 |
| YALIO_F11099g |                                     |                                                                                                                                            | Hypothetical protein conserved in the <i>Yarrowia</i> clade                                                                 |                                    |                                                  | 2.02 |
| YALIO_A19910g |                                     | Aldo/keto reductase                                                                                                                        | Similar to uniprot p47137 <i>saccharomyces cerevisiae</i> yjr096w putative xylose and arabinose reductase                   |                                    | Aldo-keto reductase involved in polyol synthesis | 2.05 |
| YALIO_B21692g |                                     |                                                                                                                                            | Similar to uniprot A2RA32 <i>Aspergillus niger</i> short- chain dehydrogenase/reductase                                     |                                    |                                                  | 2.07 |
| YALIO_D09427g |                                     | Short-chain dehydrogenase/reductase pkfc                                                                                                   | Weakly similar to uniprot o74959 <i>schizosaccharomyces pombe</i> hypothetical short chain dehydrogenase                    |                                    |                                                  | 2.17 |
| YALIO_D08602g |                                     | PROTEIN FMP25, MITOCHONDRIAL, involved in mitochondrial respiratory chain complex III assembly                                             | Some similarities with uniprot Q08023 <i>Saccharomyces cerevisiae</i> YLR077w                                               |                                    | Protein involved in mitochondrial respiration    | 2.20 |

|               |                                                             |                                                                                                           |                                                                                                                                              |                                               |                                                  |       |
|---------------|-------------------------------------------------------------|-----------------------------------------------------------------------------------------------------------|----------------------------------------------------------------------------------------------------------------------------------------------|-----------------------------------------------|--------------------------------------------------|-------|
| YALIO_F28083g | <b>NOG2</b>                                                 | Nucleolar gtp-binding protein 2                                                                           | Similar to uniprot   p53742 <i>saccharomyces cerevisiae</i> ynr053c nog2 gtpase                                                              |                                               |                                                  | 2.24  |
| YALIO_F24409g | HIG1 domain-containing protein                              | RESPIRATORY SUPERCOMPLEX FACTOR 2, MITOCHONDRIAL, involved in mitochondrial cytochrome c oxidase assembly | Weakly similar to uniprot   P53721 <i>Saccharomyces cerevisiae</i> YNR018w                                                                   |                                               | Protein involved in mitochondrial respiration    | 2.27  |
| YALIO_D09933g | Alternative oxidase                                         | Oxidase, involved in aerobic respiration                                                                  | Similar to uniprot   q8j0i8 <i>yarrowia lipolytica</i> yali0e00814g aox1                                                                     | Alternative oxidase                           | Protein involved in mitochondrial respiration    | 2.32  |
| YALIO_D18403g | ATG26, Sterol 3-beta-glucosyltransferase                    | Sterol 3-beta-glucosyltransferase                                                                         | Ugt51/atg26 udp-glucose:sterol glucosyltransferase                                                                                           |                                               |                                                  | 3.03  |
| YALIO_B07117g | Aldo_ket_red domain-containing protein                      | Aldo/keto reductase                                                                                       | Gcy12 galactose-induced protein of aldo/keto reductase family                                                                                |                                               | Aldo-keto reductase involved in polyol synthesis | 3.53  |
| YALIO_B04928g | ISU1, Iron sulfur cluster assembly protein 1, mitochondrial | Chaperone, IRON-SULFUR CLUSTER ASSEMBLY ENZYME NIFU HOMOLOG, involved in cellular iron ion homeostasis    | Similar to uniprot   Q03020 <i>Saccharomyces cerevisiae</i> YPL135W (ohnolog of YOR226C) ISU1 strong similarity to nitrogen fixation protein | Conserved protein of the mitochondrial matrix | Mitochondrial (co)chaperone                      | 3.80  |
| YALIO_A15906g | Aldo_ket_red domain-containing protein                      | Aldo/keto reductase                                                                                       | Gcy13 galactose-induced protein of aldo/keto reductase family                                                                                | Gtpase                                        | Aldo-keto reductase involved in polyol synthesis | 11.08 |



| ↑Osm↓Temp vs control |                                                             |                                                                                                 |                                                                                                                   |                                     |                                                                       |         |          |
|----------------------|-------------------------------------------------------------|-------------------------------------------------------------------------------------------------|-------------------------------------------------------------------------------------------------------------------|-------------------------------------|-----------------------------------------------------------------------|---------|----------|
| YALI NAME            | other name                                                  | function                                                                                        | GRYC name/annotation                                                                                              | GRYC function                       | notes                                                                 | FC ↑Osm | FC ↑O+↓T |
| YALIO_B21846g        | 4-hydroxyphenylpyruvate dioxygenase                         | Oxygenase, involved in tyrosine metabolic process, aromatic amino acid family catabolic process | Similar to uniprot e9cwp5 <i>coccidioides immitis</i> tcrp 4-hydroxyphenylpyruvate dioxygenase 4hppd hpd hppdase  | 4-hydroxyphenylpyruvate dioxygenase | Biosynthesis of amino acids. 4hppdase involved in tyrosine metabolism | -2.85   | -1.91    |
| YALIO_B19998g        | Glutamine amidotransferase type-2 domain-containing protein | Fad nadph dehydrogenase/oxidoreductase                                                          | Similar to uniprot q12680 <i>saccharomyces cerevisiae</i> ydl171c <b>glt1</b> glutamate synthase (napdph) (gogat) |                                     | Biosynthesis of amino acids, implicated in glutamate synthesis        | -1.76   | -1.75    |
| YALIO_B12166g        | <b>MBF1</b> , Putative multi-protein-binding factor 1       | Endothelial differentiation-related factor 1                                                    | <b>Mbf1</b> putative multi-protein binding factor 1                                                               |                                     |                                                                       | -1.51   | -1.70    |
| YALIO_E34793g        | ATP citrate synthase                                        | Transferase                                                                                     | <b>Act1</b> atp citrate lyase                                                                                     |                                     | Protein involved in glycolysis and tca                                | -1.66   | -1.62    |
| YALIO_B04312g        | Inositol-3-phosphate synthase                               | Inositol-3-phosphate synthase 1                                                                 | <b>Ino1</b> myo-inositol-1-phosphate synthase                                                                     |                                     |                                                                       | -2.06   | -1.54    |
| YALIO_B08030g        | <b>LIP3</b>                                                 | Carboxylic ester hydrolase                                                                      | <b>Lip3</b> carboxylesterase/lipase type b                                                                        |                                     |                                                                       | -1.22   | -1.48    |
| YALIO_B15059g        | <b>FAS1</b> , Fatty acid synthase subunit beta              | Fatty acid synthase subunit beta                                                                | <b>Fas1</b> fatty acid synthase subunit beta, putative                                                            |                                     | Protein involved in fatty acid metabolism                             | -1.50   | -1.47    |
| YALIO_B14014g        | Alcohol oxidase                                             | Glucose-methanol-choline gmc oxidoreductase                                                     | <b>Fao1</b> fatty alcohol oxidase                                                                                 |                                     | Protein involved in fatty acid metabolism                             | -1.45   | -1.45    |
| YALIO_D13024g        | Gln-synt_C domain-containing protein                        | Ligase, TYPE-1 GLUTAMINE SYNTHETASE 2                                                           | Similar to uniprot Q96WJ7 <i>Blumeria graminis</i> Glutamine synthetase (Glutamate--ammonia ligase)               |                                     | Glutamine synthetase                                                  | -1.21   | -1.41    |
| YALIO_E19899g        | AB hydrolase-1 domain-containing protein                    | 2-succinyl-6-hydroxy-2,4-cyclohexadiene-1-carboxylate synthase                                  | Weakly similar to uniprot q7rzl5 <i>neurospora crassa</i> ncu00350.1                                              |                                     |                                                                       | -1.31   | -1.39    |
| YALIO_B17402g        | Adenylosuccinate lyase                                      | Involved in purine ribonucleotide biosynthetic process, AMP metabolic process                   | Highly similar to uniprot Q05911 <i>Saccharomyces cerevisiae</i> YLR359w ADE13 adenylosuccinate lyase             |                                     |                                                                       | -1.23   | -1.39    |

|               |                                           |                                                                                                                                      |                                                                                                                                           |                                                              |       |       |
|---------------|-------------------------------------------|--------------------------------------------------------------------------------------------------------------------------------------|-------------------------------------------------------------------------------------------------------------------------------------------|--------------------------------------------------------------|-------|-------|
| YALIO_D24750g | <b>POX3</b> , Acyl-coenzyme A oxidase 3   | Oxidoreductase in peroxisome, involved in lipid homeostasis, fatty acid beta-oxidation                                               | <b>Pox3</b> fatty-acyl coenzyme a oxidase                                                                                                 | Protein involved in fatty acid metabolism                    | -1.41 | -1.39 |
| YALIO_E20405g |                                           | Long-chain-fatty-acid--coa ligase                                                                                                    | <b>Aal7</b> acyl/aryl-coa ligase                                                                                                          |                                                              | -1,35 | -1.38 |
| YALIO_D16841g | MMS19 nucleotide excision repair protein  | Scaffold/adaptor protein, DNA REPAIR/TRANSCRIPTION PROTEIN MET18/MMS19, involved in iron-sulfur cluster assembly, protein maturation | Weakly similar to uniprot P40469 <i>Saccharomyces cerevisiae</i> YIL128w MET18 involved in NER repair and RNA polymerase II transcription |                                                              | -1.68 | -1.38 |
| YALIO_D24431g |                                           |                                                                                                                                      | <b>ACL2</b> ATP citrate lyase                                                                                                             | Protein involved in glycolysis and TCA                       | -1.44 | -1.36 |
| YALIO_A00264g | Isoleucyl-tRNA synthetase                 | Ligase activity, involved in trna metabolic process, translational elongation, cellular amino acid metabolic process                 | Similar to uniprot P09436 <i>Saccharomyces cerevisiae</i> YBL076c ILS1 isoleucyl-tRNA synthetase                                          | Amino acid-trna (aa-trna) synthetases specific to Isoleucine | -1.41 | -1.35 |
| YALIO_B19382g | Fatty acid synthase subunit alpha         |                                                                                                                                      | <b>FAS2</b> Fatty acid synthase subunit alpha                                                                                             |                                                              | -1.45 | -1.35 |
| YALIO_A20108g | Glutamine-dependent NAD(+) synthetase     | Ligase, GLUTAMINE-DEPENDENT NAD(+) SYNTHETASE                                                                                        | Highly similar to uniprot P38795 <i>Saccharomyces cerevisiae</i> YHR074w QNS1 Putative glutamine-dependent NAD(+) synthetase              | Glutamine synthetase                                         | -1.28 | -1.34 |
| YALIO_D21890g | Alpha-mannosidase                         | Alpha-mannosidase 2c1                                                                                                                | Similar to uniprot p22855 <i>saccharomyces cerevisiae</i> ygl156w ams1 alpha-mannosidase singleton                                        | Vacuolar alpha mannosidase                                   | -1.14 | -1.32 |
| YALIO_F10857g | <b>POX2</b> Acyl-coenzyme A oxidase 2     | Oxidoreductase, ACYL-COENZYME A OXIDASE-LIKE PROTEIN                                                                                 | <b>POX2</b> Fatty-acyl coenzyme A oxidase                                                                                                 |                                                              | -1.32 | -1.32 |
| YALIO_A08077g | Serine/threonine-protein phosphatase      | Protein phosphatase, SERINE/THREONINE PROTEIN PHOSPHATASE                                                                            | Highly similar to uniprot P20654 <i>Emericella nidulans</i> serine-threonine protein phosphatase PP1                                      |                                                              | -1.26 | -1.32 |
| YALIO_F20592g |                                           | Metalloprotease, ASPARTYL AMINOPEPTIDASE                                                                                             | Similar to uniprot P14904 <i>Saccharomyces cerevisiae</i> YKL103c LAP4 aminopeptidase ysci precursor, vacuolar                            | Protein involved in proteolysis via vacuolar degradation     | -1.32 | -1.31 |
| YALIO_A21417g | Beta_elim_lyase domain-containing protein | Aldolase, L-THREONINE ALDOLASE-RELATED                                                                                               | <b>CNT2</b> Hydroxytrimethyllysine aldolase, the second enzyme in the carnitine biosynthesis pathway                                      |                                                              | -1.33 | -1.31 |

|               |                                                           |                                                                                |                                                                                                                                                                       |                                                                        |       |       |
|---------------|-----------------------------------------------------------|--------------------------------------------------------------------------------|-----------------------------------------------------------------------------------------------------------------------------------------------------------------------|------------------------------------------------------------------------|-------|-------|
| YALIO_C24101g | Pyruvate carboxylase                                      | Ligase, PYRUVATE CARBOXYLASE, MITOCHONDRIAL                                    | <b>PYC1</b> Pyruvate carboxylase                                                                                                                                      | Protein involved in glycolysis and TCA                                 | -1.27 | -1.30 |
| YALIO_C10494g |                                                           | Metalloprotease, ASPARTYL AMINOPEPTIDASE                                       | Similar to uniprot P14904 <i>Saccharomyces cerevisiae</i> YKL103C LAP4 Vacuolar aminopeptidase                                                                        |                                                                        | -1.31 | -1.27 |
| YALIO_C01859g | Methylmalonate-semialdehyde dehydrogenase (CoA acylating) | Dehydrogenase                                                                  | Similar to uniprot q02253 <i>rattus norvegicus</i> methylmalonate-semialdehyde dehydrogenase (acylating), mitochondrial precursor (mmsdh)                             |                                                                        | -1.12 | -1.27 |
| YALIO_D26367g | Arginosuccinase                                           | Argininosuccinate lyase                                                        | Highly similar to uniprot p04076 <i>saccharomyces cerevisiae</i> yhr018c <b>arg4</b> arginosuccinate lyase                                                            | Playing role in synthesis of arginine                                  | -1.15 | -1.27 |
| YALIO_E07271g |                                                           | Ligase, CARBOXYLASE:PYRUVATE/ACETYL-COA/PROPIONYL-COA CARBOXYLASE              | <b>URC3</b> Urea carboxylase and allophanate hydrolase activities involved in uracil catabolism                                                                       |                                                                        | -1.40 | -1.27 |
| YALIO_D21010g | 6PF2K domain-containing protein                           | Carbohydrate phosphatase, 6-PHOSPHOFRUCTO-2-KINASE/FRUCTOSE-2,6-BISPHOSPHATASE | Weakly similar to uniprot Q06137 <i>Saccharomyces cerevisiae</i> YLR345w similarity to PFK26P and other 6- phosphofructo-2-kinases                                    | 6-phosphofructo-2-kinase                                               | -1.14 | -1.26 |
| YALIO_D25168g |                                                           | Homocysteine/cysteine synthase                                                 | Similar to uniprot p06106 <i>saccharomyces cerevisiae</i> ylr303w met25 o-acetylhomoserine sulfhydrylase                                                              | Cysk-met25, playing role in synthesis of sulfur-containing amino acids | -1.26 | -1.26 |
| YALIO_E05027g | Prolyl-tRNA synthetase                                    | Bifunctional glutamate/proline--trna ligase                                    | Similar to uniprot p38708 <i>saccharomyces cerevisiae</i> yhr020w conserved protein of unknown function that may interact with ribosomes, putative prolyl-trna ligase | Amino acid-trna (aa-trna) synthetases specific to proline              | -1.23 | -1.25 |
| YALIO_E17985g | Arginyl-tRNA synthetase                                   | Arginine--trna ligase, mitochondrial-related                                   | Similar to uniprot q05506 <i>saccharomyces cerevisiae</i> ydr341c (ohnolog of yhr091c) arginyl-trna synthetase, cytosolic                                             | Amino acid-trna (aa-trna) synthetases specific to arginine             | -1.16 | -1.24 |
| YALIO_C24420g |                                                           | Elongation factor 1-gamma                                                      | Similar to uniprot p29547 <i>saccharomyces cerevisiae</i> ypl048w cam1 translation elongation factor eef1 gamma homologue                                             |                                                                        | -1.15 | -1.24 |
| YALIO_C22088g |                                                           | Lyase, CYSTATHIONINE GAMMA-SYNTHASE                                            | Similar to uniprot P38716 <i>Saccharomyces cerevisiae</i> YHR112c similarity to cystathionine gamma-synthases                                                         | Metb, playing role in synthesis of sulfur-containing amino acids       | -1.21 | -1.23 |
| YALIO_E19184g |                                                           | Protease, XAA-PRO AMINOPEPTIDASE 1                                             | Similar to uniprot Q8RY11 <i>Arabidopsis thaliana</i> AT3g05350/T12H1_32, putative X-pro dipeptidase                                                                  |                                                                        | -1.18 | -1.23 |
| YALIO_F29337g | Aspartate aminotransferase                                | Aspartate transaminase                                                         | Similar to uniprot p23542 <i>saccharomyces cerevisiae</i> ylr027c <b>aat2</b> aspartate aminotransferase                                                              | Biosynthesis of amino acids, implicated in glutamate synthesis         | -1.17 | -1.23 |
| YALIO_F24717g | RRM domain-                                               | RNA splicing factor, RRM                                                       | Weakly similar to uniprot C5JP18 <i>Ajellomyces dermatitidis</i>                                                                                                      |                                                                        | -1.19 | -1.23 |

|               |                                            |                                                                                                                                 |                                                                                                                             |                               |                                                                                                                                                                                                                                                                 |       |       |
|---------------|--------------------------------------------|---------------------------------------------------------------------------------------------------------------------------------|-----------------------------------------------------------------------------------------------------------------------------|-------------------------------|-----------------------------------------------------------------------------------------------------------------------------------------------------------------------------------------------------------------------------------------------------------------|-------|-------|
|               | containing protein                         | DOMAIN-CONTAINING PROTEIN                                                                                                       | (Blastomyces dermatitidis) BDBG_04101 Grp1p, RNP domain-containing protein                                                  |                               |                                                                                                                                                                                                                                                                 |       |       |
| YALIO_E05005g | Asparaginyl-tRNA synthetase                | Aminoacyl-tRNA synthetase, ASPARAGINE--TRNA LIGASE, CYTOPLASMIC                                                                 | Similar to uniprot P38707 <i>Saccharomyces cerevisiae</i> YHR019c DED81 asparaginyl-tRNA-synthetase                         |                               | Amino acid-tRNA (aa-tRNA) synthetases specific to Asparagine                                                                                                                                                                                                    | -1.23 | -1.21 |
| YALIO_C10901g | Thymidylate synthase                       | Methyltransferase, THYMIDYLATE SYNTHASE                                                                                         | Highly similar to uniprot P06785 <i>Saccharomyces cerevisiae</i> YOR074c CDC21 thymidylate synthase                         |                               |                                                                                                                                                                                                                                                                 | -1.17 | -1.21 |
| YALIO_F08283g | Nudix hydrolase domain-containing protein  | Hydrolase, PEROXISOMAL NADH PYROPHOSPHATASE NUDT12                                                                              | Weakly similar to uniprot P53164 <i>Saccharomyces cerevisiae</i> YGL067w NPY1 NADH pyrophosphatase I                        |                               |                                                                                                                                                                                                                                                                 | -1.16 | -1.21 |
| YALIO_D08976g | PCI domain-containing protein              | 26S PROTEASOME NON-ATPASE REGULATORY SUBUNIT 11, involved in ubiquitin-dependent protein catabolic process, proteasome assembly | Similar to uniprot Q12377 <i>Saccharomyces cerevisiae</i> YDL097c RPN6 subunit of the regulatory particle of the proteasome |                               |                                                                                                                                                                                                                                                                 | -1.16 | -1.21 |
| YALIO_B00726g | <b>DYS1</b><br>Deoxyhypusine synthase      | Deoxyhypusine synthase                                                                                                          | Highly similar to uniprot p38791 <i>saccharomyces cerevisiae</i> yhr068w dys1 deoxyhypusine synthase                        |                               | <b>Tub2</b> , tubulin                                                                                                                                                                                                                                           | -1.18 | -1.20 |
| YALIO_E02662g | <b>ATG8</b><br>Autophagy-related protein 8 | Non-motor microtubule binding protein, GAMMA-AMINOBUTYRIC ACID RECEPTOR-ASSOCIATED PROTEIN-LIKE 2                               | Highly similar to uniprot P38182 <i>Saccharomyces cerevisiae</i> YBL078c AUT7 essential for autophagy                       |                               | Multifunctional protein involved in autophagy-related processes, including selective nucleophagy, mitophagy, endoplasmic reticulum-specific autophagic process, autophagosomes formation and expansion, membrane invagination and filamentous growth regulation | 1.10  | 1.35  |
| YALIO_F23551g |                                            | Sulfurtransferase                                                                                                               | Similar to uniprot q875d2 <i>podospira anserina</i> , similarity to thiosulfate sulfurtransferases                          | Thiosulfate sulfurtransferase |                                                                                                                                                                                                                                                                 | 1.31  | 1.36  |
| YALIO_D12386g | Epimerase domain-                          | NAD dependent epimerase/dehydratase                                                                                             | Similar to uniprot p53111 <i>saccharomyces cerevisiae</i> ygl157w ari1 NADPH-dependent aldehyde reductase                   |                               | Aldo-keto reductase                                                                                                                                                                                                                                             | 1.39  | 1.43  |

|               |                                        |                                                          |                                                                                                                                                            |        |                                                  |               |
|---------------|----------------------------------------|----------------------------------------------------------|------------------------------------------------------------------------------------------------------------------------------------------------------------|--------|--------------------------------------------------|---------------|
|               | containing protein                     |                                                          |                                                                                                                                                            |        |                                                  |               |
| YALIO_E02024g |                                        |                                                          | Hypothetical protein conserved in the <i>Yarrowia</i> clade                                                                                                |        | 1.67                                             | 1.67          |
| YALIO_A19910g |                                        | Aldo/keto reductase                                      | Similar to uniprot p47137 <i>saccharomyces cerevisiae</i> yjr096w putative xylose and arabinose reductase                                                  |        | Aldo-keto reductase involved in polyol synthesis | 2.05<br>1.74  |
| YALIO_B11132g |                                        | Nuclear transport factor 2                               | Weakly similar to uniprot p34232 <i>saccharomyces cerevisiae</i> ykl186c mtr2 mrna transport protein                                                       |        |                                                  | 1.34<br>1.95  |
| YALIO_D00451g |                                        |                                                          | Hypothetical protein conserved in the <i>Yarrowia</i> clade                                                                                                |        |                                                  | 2.34<br>2.17  |
| YALIO_C21065g |                                        |                                                          | Some similarities with uniprot P47011 <i>Saccharomyces cerevisiae</i> YJL137C (ohnolog of YKR058W) GLG2 self-glucosylating initiator of glycogen synthesis |        |                                                  | 1.80<br>2.46  |
| YALIO_B07117g | Aldo_ket_red domain-containing protein | Aldo-keto reductase family 1 member a1                   | <b>Gcy12</b> galactose-induced protein of aldo/keto reductase family                                                                                       |        |                                                  | 3.53<br>3.71  |
| YALIO_A15906g | Aldo_ket_red domain-containing protein | Aldo/keto reductase                                      | <b>Gcy13</b> galactose-induced protein of aldo/keto reductase family                                                                                       | Gtpase |                                                  | 11.08<br>9.27 |
| YALIO_E34485g | Metallophos domain-containing protein  | METALLOPHOS DOMAIN-CONTAINING PROTEIN; phosphodiesterase | Hypothetical protein conserved in the <i>Yarrowia</i> clade                                                                                                |        |                                                  | 2.14<br>13.30 |

Table S4 Details of Venn diagram analysis

| UP [Osm] and [Osm + Temp]: | UP [Osm + Temp]: | DWN [Osm] and [Osm + Temp]: | DWN [Osm + Temp]: | DWN [Osm]:    | UP [Osm]:     |
|----------------------------|------------------|-----------------------------|-------------------|---------------|---------------|
| YALIO_F23551g              | YALIO_E02662g    | YALIO_B21846g               | YALIO_B19998g     | YALIO_C19096g | YALIO_C19624g |
| YALIO_E02024g              | YALIO_D12386g    | YALIO_B04312g               | YALIO_B12166g     | YALIO_C06325g | YALIO_A19888g |
| YALIO_A19910g              | YALIO_B11132g    | YALIO_D16841g               | YALIO_B08030g     | YALIO_A12177g | YALIO_E25696g |
| YALIO_B07117g              | YALIO_D00451g    | YALIO_E34793g               | YALIO_D13024g     | YALIO_A21439g | YALIO_C03850g |
| YALIO_A15906g              | YALIO_C21065g    | YALIO_B15059g               | YALIO_E19899g     | YALIO_F04620g | YALIO_F00880g |
|                            | YALIO_E34485g    | YALIO_B14014g               | YALIO_B17402g     | YALIO_F31735g | YALIO_C11341g |
|                            |                  | YALIO_B19382g               | YALIO_A20108g     | YALIO_D11125g | YALIO_B09647g |
|                            |                  | YALIO_D24431g               | YALIO_D21890g     | YALIO_B21428g | YALIO_B14102g |
|                            |                  | YALIO_D24750g               | YALIO_F10857g     | YALIO_D16467g | YALIO_E02310g |
|                            |                  | YALIO_A00264g               | YALIO_A08077g     | YALIO_E31625g | YALIO_D01980g |
|                            |                  | YALIO_E20405g               | YALIO_C01859g     | YALIO_F14245g | YALIO_B09471g |
|                            |                  | YALIO_A21417g               | YALIO_D26367g     | YALIO_E16324g | YALIO_F16379g |
|                            |                  | YALIO_F20592g               | YALIO_E07271g     | YALIO_F21406g | YALIO_D22352g |
|                            |                  | YALIO_C10494g               | YALIO_D21010g     | YALIO_E19536g | YALIO_D08778g |
|                            |                  | YALIO_C24101g               | YALIO_E17985g     | YALIO_D13090g | YALIO_F22187g |
|                            |                  | YALIO_D25168g               | YALIO_C24420g     | YALIO_F10098g | YALIO_F00682g |
|                            |                  | YALIO_E05027g               | YALIO_E19184g     | YALIO_B19162g | YALIO_B00924g |
|                            |                  | YALIO_E05005g               | YALIO_F29337g     | YALIO_E00726g | YALIO_C07502g |
|                            |                  | YALIO_C22088g               | YALIO_F24717g     | YALIO_D06930g | YALIO_D06501g |
|                            |                  |                             | YALIO_C10901g     | YALIO_D12144g | YALIO_C04213g |
|                            |                  |                             | YALIO_F08283g     | YALIO_F28413g | YALIO_F27379g |
|                            |                  |                             | YALIO_D08976g     | YALIO_A06743g | YALIO_A06435g |
|                            |                  |                             | YALIO_B00726g     | YALIO_B03630g | YALIO_E27962g |
|                            |                  |                             |                   | YALIO_F19910g | YALIO_B15840g |
|                            |                  |                             |                   | YALIO_E19360g | YALIO_F04169g |
|                            |                  |                             |                   | YALIO_B07667g | YALIO_E33297g |
|                            |                  |                             |                   | YALIO_F08591g | YALIO_D13442g |
|                            |                  |                             |                   | YALIO_B02860g | YALIO_F12463g |
|                            |                  |                             |                   | YALIO_F09185g | YALIO_E35046g |
|                            |                  |                             |                   | YALIO_F12661g | YALIO_F06688g |
|                            |                  |                             |                   | YALIO_F16291g | YALIO_D16775g |
|                            |                  |                             |                   | YALIO_D10571g | YALIO_B10362g |
|                            |                  |                             |                   | YALIO_B14399g | YALIO_B15510g |
|                            |                  |                             |                   | YALIO_E24607g | YALIO_F24937g |
|                            |                  |                             |                   | YALIO_B14509g | YALIO_B08272g |
|                            |                  |                             |                   | YALIO_E28468g | YALIO_F11099g |
|                            |                  |                             |                   | YALIO_E13035g | YALIO_B21692g |
|                            |                  |                             |                   | YALIO_A12045g | YALIO_D09427g |
|                            |                  |                             |                   | YALIO_B19558g | YALIO_D08602g |
|                            | YALIO_B02838g    | YALIO_F28083g               |                   |               |               |
|                            | YALIO_E15642g    | YALIO_F24409g               |                   |               |               |
|                            | YALIO_F09834g    | YALIO_D09933g               |                   |               |               |
|                            | YALIO_B08943g    | YALIO_D18403g               |                   |               |               |
|                            | YALIO_F07711g    | YALIO_B04928g               |                   |               |               |
